# Supplementary material for: Chromatin accessibility profiling by ATAC-seq
Source: Springer Nature journal article supplement (doi:10.1038/s41596-022-00692-9), 2022-04-27
Supplement: MOESM2 [file 41596_2022_692_MOESM2_ESM15.xlsx]

## Sheet: Table S1 -Summary Stats
Supplementary Table 1 - Page 1 of 1
Alignment statistics for different ATAC-seq library read lengths
This page of the table shows the alignment information from PEPATAC for 4 different data sets trimmed to various lengths at the initial FASTQ stage.
All data was aligned to the hg38 reference genome.
Row Explanation
Each row represents a different ATAC-seq library originating from a different input cell material or with a different trimmed read length.
Column Explanations
Please see the PEPATAC documentation for a full explanation of how metrics are calculated (http://pepatac.databio.org/)
Sample -	Sample
Read_length -	Read length that each sample pepatac run was trimmed to. The original files are derived from 75bp reads.
Fastq_reads -	number of reads in input fastq files
Mapped_reads -	The number of reads mapped to primary genome.
QC_filtered_reads -	The number of reads removed due to poor MAPQ values (i.e. <10).
Aligned_reads -	Mapped_reads - QC_filtered_reads
Total_efficiency -	The percentage of raw reads that mapped to the primary genome
TSS_score -	TSS score; see PEPATAC for calculation.
Alignment_rate_rCRSd -	Alignment rate to mitochondrial genome
Alignment_rate_human_alphasat -	Alignment rate to alpha satellite reads
Alignment_rate_human_alu -	Alignment rate to Alu repeats
Alignment_rate_human_rDNA -	Alignment rate to ribosomal DNA
Mitochondrial_reads -	Total number of mapped mitochondrial reads
Unmapped_reads -	The number of trimmed reads that remains unmapped following prealignment and primary alignment.
Duplicate_reads -	The number of duplicate reads removed from the mapped reads.
Dedup_aligned_reads -	The number of aligned reads following duplicate removal
Dedup_alignment_rate -	The number of deduplicated, aligned reads out of the number of trimmed reads.
Sample	Read_length	Fastq_reads	Mapped_reads	QC_filtered_reads	Aligned_reads	Total_efficiency	TSS_score	Alignment_rate_rCRSd	Alignment_rate_human_alphasat	Alignment_rate_human_alu	Alignment_rate_human_rDNA	Mitochondrial_reads	Unmapped_reads	Duplicate_reads	Dedup_aligned_reads	Dedup_alignment_rate
GM12878	10	74059206	2128746	1754412	374334	0.51	13	66.17	16.79	2.16	12	0	62	3205	371129	0.5
GM12878	15	74059206	60696517	6950099	53746418	72.57	14.2	11.52	0.63	3.36	2.52	4385	2021	1400670	52345748	70.68
GM12878	20	74059206	62355160	4740180	57614980	77.8	13.9	11.33	0.26	2.2	1.19	9819	602348	1505531	56109449	75.76
GM12878	25	74059206	61871443	3932337	57939106	78.23	13.8	11.34	0.28	2.46	1.23	6658	851519	1513862	56425244	76.19
GM12878	30	74059206	61751630	3687910	58063720	78.4	13.8	11.34	0.28	2.67	1.1	5139	905026	1517195	56546525	76.35
GM12878	35	74059206	61412634	3548112	57864522	78.13	13.7	11.31	0.29	3.01	1.02	6445	1073650	1512672	56351850	76.09
GM12878	40	74059206	61463108	4426092	57037016	77.02	13.5	11.25	0.27	2.74	0.9	5166	1360404	1473938	55563078	75.03
GM12878	45	74059206	60950903	6193789	54757114	73.94	13.4	11.1	0.27	2.74	0.84	21810	2039359	1394263	53362851	72.05
GM12878	50	74059206	59872724	6870478	53002246	71.57	13.3	10.75	0.27	2.71	0.8	37554	3435802	1325736	51676510	69.78
GM12878	55	74059206	58553196	6951492	51601704	69.68	13.1	10.23	0.24	2.33	0.74	47097	5466584	1269810	50331894	67.96
GM12878	60	74059206	56957476	6820020	50137456	67.7	12.9	9.71	0.24	2.33	0.7	48066	7488666	1214791	48922665	66.06
GM12878	65	74059206	55711668	6744746	48966922	66.12	12.7	9.21	0.22	2.1	0.66	48082	9321482	1168619	47798303	64.54
GM12878	70	74059206	54375064	6587000	47788064	64.53	12.5	8.73	0.22	2.05	0.63	44564	11075142	1122392	46665672	63.01
K562	10	61469172	191644	157742	33902	0.06	11.7	66.26	16.44	2.57	12.06	0	0	174	33728	0.05
K562	15	61469172	47909333	6984433	40924900	66.58	12.5	12.8	0.93	4.64	3.68	4874	917	976096	39948804	64.99
K562	20	61469172	49744473	5252213	44492260	72.38	12.1	12.61	0.52	3.12	2.24	25609	363269	1064851	43427409	70.65
K562	25	61469172	49280474	4444108	44836366	72.94	12	12.62	0.55	3.47	2.29	18657	550402	1073208	43763158	71.2
K562	30	61469172	49130882	4146852	44984030	73.18	12	12.63	0.55	3.77	2.14	12745	600134	1077380	43906650	71.43
K562	35	61469172	48753360	3973798	44779562	72.85	11.9	12.59	0.57	4.22	2.04	8577	775532	1072706	43706856	71.1
K562	40	61469172	48817525	4802887	44014638	71.6	11.6	12.52	0.54	3.85	1.9	5956	1088547	1039046	42975592	69.91
K562	45	61469172	48292777	6539229	41753548	67.93	11.6	12.3	0.53	3.82	1.82	23904	1823393	966018	40787530	66.35
K562	50	61469172	47211684	6968064	40243620	65.47	11.3	11.82	0.52	3.75	1.75	41174	3287160	913530	39330090	63.98
K562	55	61469172	45926584	6851884	39074700	63.57	11	11.14	0.47	3.23	1.67	49092	5390572	871109	38203591	62.15
K562	60	61469172	44440205	6568207	37871998	61.61	10.8	10.48	0.46	3.21	1.59	48111	7356283	830376	37041622	60.26
K562	65	61469172	43359430	6429674	36929756	60.08	10.6	9.86	0.43	2.88	1.53	46899	9076588	797271	36132485	58.78
K562	70	61469172	42159858	6170338	35989520	58.55	10.3	9.28	0.41	2.8	1.48	44673	10721924	765373	35224147	57.3
lung adenocarcinoma	10	60540574	1919587	1562161	357426	0.59	10.6	62.92	18.75	2.46	12.7	3	265	4794	352632	0.58
lung adenocarcinoma	15	60540574	52915222	6787762	46127460	76.19	10.2	2.93	1.6	4.02	4.05	2124	988	2841769	43285691	71.5
lung adenocarcinoma	20	60540574	54813239	4918731	49894508	82.41	10	2.71	1.06	2.66	2.55	13741	289325	3104988	46789520	77.29
lung adenocarcinoma	25	60540574	54589109	4139205	50449904	83.33	9.9	2.72	1.06	2.71	2.51	9940	503149	3141302	47308602	78.14
lung adenocarcinoma	30	60540574	54261070	3691334	50569736	83.53	9.9	2.73	1.11	3.19	2.46	6636	534286	3153785	47415951	78.32
lung adenocarcinoma	35	60540574	54338474	3481430	50857044	84	9.9	2.73	1.06	2.99	2.34	4130	683242	3172968	47684076	78.76
lung adenocarcinoma	40	60540574	54079473	3644429	50435044	83.31	9.8	2.72	1.08	3.21	2.27	2599	843393	3156926	47278118	78.09
lung adenocarcinoma	45	60540574	54106742	4143862	49962880	82.53	9.7	2.69	1	2.75	2.2	4396	1201836	3137661	46825219	77.35
lung adenocarcinoma	50	60540574	53525134	4639348	48885786	80.75	9.7	2.65	1	2.79	2.14	5215	1826262	3083844	45801942	75.65
lung adenocarcinoma	55	60540574	53093096	4777512	48315584	79.81	9.5	2.58	0.94	2.41	2.08	6605	2600606	3058686	45256898	74.75
lung adenocarcinoma	60	60540574	52348607	4854649	47493958	78.45	9.5	2.51	0.94	2.45	2.02	6425	3397093	3020088	44473870	73.46
lung adenocarcinoma	65	60540574	51803317	4980151	46823166	77.34	9.4	2.44	0.89	2.2	1.97	7386	4201415	2988115	43835051	72.41
lung adenocarcinoma	70	60540574	51067416	5073074	45994342	75.97	9.3	2.36	0.88	2.2	1.92	7239	5018376	2946546	43047796	71.11
brain	10	82077986	2623509	2127895	495614	0.6	10.1	63.24	19.12	2.16	12.29	1	65	8870	486744	0.59
brain	15	82077986	73279209	9841401	63437808	77.29	11.3	2.65	1.76	3.26	3.05	1602	2019	5214676	58223132	70.94
brain	20	82077986	75092253	6813459	68278794	83.19	11.1	2.44	1.14	2.16	1.65	8318	923603	5675267	62603527	76.27
brain	25	82077986	74588729	5831077	68757652	83.77	11	2.44	1.13	2.2	1.61	5100	1432255	5720210	63037442	76.8
brain	30	82077986	74217164	5294922	68922242	83.97	11	2.45	1.18	2.56	1.55	3268	1511806	5746436	63175806	76.97
brain	35	82077986	74336568	5065034	69271534	84.4	11	2.45	1.1	2.42	1.43	1781	1671282	5778909	63492625	77.36
brain	40	82077986	74134698	5130908	69003790	84.07	10.9	2.45	1.11	2.59	1.36	1089	1785292	5774706	63229084	77.04
brain	45	82077986	74281695	5527141	68754554	83.77	10.8	2.44	1.01	2.24	1.3	1726	2061575	5771039	62983515	76.74
brain	50	82077986	73837927	6043525	67794402	82.6	10.7	2.42	1	2.27	1.25	2788	2540313	5713962	62080440	75.64
brain	55	82077986	73588973	6142457	67446516	82.17	10.6	2.4	0.93	1.98	1.21	3632	3142249	5703614	61742902	75.22
brain	60	82077986	73001462	6179122	66822340	81.41	10.5	2.37	0.92	2.02	1.17	3763	3756680	5673644	61148696	74.5
brain	65	82077986	72617760	6259712	66358048	80.85	10.4	2.34	0.87	1.83	1.14	4501	4393500	5654296	60703752	73.96
brain	70	82077986	72058073	6360275	65697798	80.04	10.3	2.3	0.85	1.83	1.11	4968	5013663	5618273	60079525	73.2

## Sheet: Table S2 -Adapters and barcodes
Supplementary Table 2 - Page 1 or 1
ATAC-seq dual-indexing adapter and barcode sequences
This table provides sequences and barcodes for 92 i5 adapters and 96 i7 adapters. These sequences are directly reproduced from Supplementary Table 1 of Buenrostro et al. Nature 2015 (PMID: 26083756).
All adapter sequences here can be ordered with standard desalting conditions. We order adapters from IDT. Because the i5 adapters are 61 bases long, we order these at 100 nmole scale. We order the i7 adapters at either 25 nmole or 100 nmole scale.
For each adapter, the 8-bp sequence corresponding to the barcode region is shown in red text. Because different Illumina sequencers read this index sequence from different directions, we provide both.
Custom Barcodes Adapter 1 (index i5):		SampleSheet Barcode - Forward Strand Workflow	SampleSheet Barcode - Reverse Complement Workflow
Adapter Name	Adapter Sequence	(For MiSeq, NovaSeq, HiSeq 2000/2500)	(For HiSeq 4000, NextSeq, iSeq, MiniSeq)
Ad1.1	AATGATACGGCGACCACCGAGATCTACACTAGATCGCTCGTCGGCAGCGTCAGATGTGTAT	TAGATCGC	GCGATCTA
Ad1.2	AATGATACGGCGACCACCGAGATCTACACCTCTCTATTCGTCGGCAGCGTCAGATGTGTAT	CTCTCTAT	ATAGAGAG
Ad1.3	AATGATACGGCGACCACCGAGATCTACACTATCCTCTTCGTCGGCAGCGTCAGATGTGTAT	TATCCTCT	AGAGGATA
Ad1.4	AATGATACGGCGACCACCGAGATCTACACAGAGTAGATCGTCGGCAGCGTCAGATGTGTAT	AGAGTAGA	TCTACTCT
Ad1.5	AATGATACGGCGACCACCGAGATCTACACGTAAGGAGTCGTCGGCAGCGTCAGATGTGTAT	GTAAGGAG	CTCCTTAC
Ad1.6	AATGATACGGCGACCACCGAGATCTACACACTGCATATCGTCGGCAGCGTCAGATGTGTAT	ACTGCATA	TATGCAGT
Ad1.7	AATGATACGGCGACCACCGAGATCTACACAAGGAGTATCGTCGGCAGCGTCAGATGTGTAT	AAGGAGTA	TACTCCTT
Ad1.8	AATGATACGGCGACCACCGAGATCTACACCTAAGCCTTCGTCGGCAGCGTCAGATGTGTAT	CTAAGCCT	AGGCTTAG
Ad1.9	AATGATACGGCGACCACCGAGATCTACACTGGAAATCTCGTCGGCAGCGTCAGATGTGTAT	TGGAAATC	GATTTCCA
Ad1.10	AATGATACGGCGACCACCGAGATCTACACAACATGATTCGTCGGCAGCGTCAGATGTGTAT	AACATGAT	ATCATGTT
Ad1.11	AATGATACGGCGACCACCGAGATCTACACTGATGAAATCGTCGGCAGCGTCAGATGTGTAT	TGATGAAA	TTTCATCA
Ad1.12	AATGATACGGCGACCACCGAGATCTACACGTCGGACTTCGTCGGCAGCGTCAGATGTGTAT	GTCGGACT	AGTCCGAC
Ad1.13	AATGATACGGCGACCACCGAGATCTACACTTTCTAGCTCGTCGGCAGCGTCAGATGTGTAT	TTTCTAGC	GCTAGAAA
Ad1.14	AATGATACGGCGACCACCGAGATCTACACTAACCAAGTCGTCGGCAGCGTCAGATGTGTAT	TAACCAAG	CTTGGTTA
Ad1.15	AATGATACGGCGACCACCGAGATCTACACGTGTATCGTCGTCGGCAGCGTCAGATGTGTAT	GTGTATCG	CGATACAC
Ad1.16	AATGATACGGCGACCACCGAGATCTACACTCCATCAATCGTCGGCAGCGTCAGATGTGTAT	TCCATCAA	TTGATGGA
Ad1.17	AATGATACGGCGACCACCGAGATCTACACTTCGTGCATCGTCGGCAGCGTCAGATGTGTAT	TTCGTGCA	TGCACGAA
Ad1.18	AATGATACGGCGACCACCGAGATCTACACAGGTTGCCTCGTCGGCAGCGTCAGATGTGTAT	AGGTTGCC	GGCAACCT
Ad1.19	AATGATACGGCGACCACCGAGATCTACACCCTTATGTTCGTCGGCAGCGTCAGATGTGTAT	CCTTATGT	ACATAAGG
Ad1.20	AATGATACGGCGACCACCGAGATCTACACCAGCAACGTCGTCGGCAGCGTCAGATGTGTAT	CAGCAACG	CGTTGCTG
Ad1.21	AATGATACGGCGACCACCGAGATCTACACGGTTCAATTCGTCGGCAGCGTCAGATGTGTAT	GGTTCAAT	ATTGAACC
Ad1.22	AATGATACGGCGACCACCGAGATCTACACACATTCGTTCGTCGGCAGCGTCAGATGTGTAT	ACATTCGT	ACGAATGT
Ad1.23	AATGATACGGCGACCACCGAGATCTACACGATTCCCATCGTCGGCAGCGTCAGATGTGTAT	GATTCCCA	TGGGAATC
Ad1.24	AATGATACGGCGACCACCGAGATCTACACCGGACTGCTCGTCGGCAGCGTCAGATGTGTAT	CGGACTGC	GCAGTCCG
Ad1.25	AATGATACGGCGACCACCGAGATCTACACAGCCGTTCTCGTCGGCAGCGTCAGATGTGTAT	AGCCGTTC	GAACGGCT
Ad1.26	AATGATACGGCGACCACCGAGATCTACACATTGGGTCTCGTCGGCAGCGTCAGATGTGTAT	ATTGGGTC	GACCCAAT
Ad1.27	AATGATACGGCGACCACCGAGATCTACACTGCATACTTCGTCGGCAGCGTCAGATGTGTAT	TGCATACT	AGTATGCA
Ad1.28	AATGATACGGCGACCACCGAGATCTACACGGGCTTGGTCGTCGGCAGCGTCAGATGTGTAT	GGGCTTGG	CCAAGCCC
Ad1.29	AATGATACGGCGACCACCGAGATCTACACGACGTGGCTCGTCGGCAGCGTCAGATGTGTAT	GACGTGGC	GCCACGTC
Ad1.30	AATGATACGGCGACCACCGAGATCTACACGCAAATTTTCGTCGGCAGCGTCAGATGTGTAT	GCAAATTT	AAATTTGC
Ad1.31	AATGATACGGCGACCACCGAGATCTACACGCAGCCTCTCGTCGGCAGCGTCAGATGTGTAT	GCAGCCTC	GAGGCTGC
Ad1.32	AATGATACGGCGACCACCGAGATCTACACTCCGAGTTTCGTCGGCAGCGTCAGATGTGTAT	TCCGAGTT	AACTCGGA
Ad1.33	AATGATACGGCGACCACCGAGATCTACACGCATTAAGTCGTCGGCAGCGTCAGATGTGTAT	GCATTAAG	CTTAATGC
Ad1.34	AATGATACGGCGACCACCGAGATCTACACACGATAACTCGTCGGCAGCGTCAGATGTGTAT	ACGATAAC	GTTATCGT
Ad1.35	AATGATACGGCGACCACCGAGATCTACACCCTGCGGGTCGTCGGCAGCGTCAGATGTGTAT	CCTGCGGG	CCCGCAGG
Ad1.36	AATGATACGGCGACCACCGAGATCTACACTGATTGTTTCGTCGGCAGCGTCAGATGTGTAT	TGATTGTT	AACAATCA
Ad1.37	AATGATACGGCGACCACCGAGATCTACACGGCACGGATCGTCGGCAGCGTCAGATGTGTAT	GGCACGGA	TCCGTGCC
Ad1.38	AATGATACGGCGACCACCGAGATCTACACGATCATTCTCGTCGGCAGCGTCAGATGTGTAT	GATCATTC	GAATGATC
Ad1.39	AATGATACGGCGACCACCGAGATCTACACATGGTCATTCGTCGGCAGCGTCAGATGTGTAT	ATGGTCAT	ATGACCAT
Ad1.40	AATGATACGGCGACCACCGAGATCTACACCGTACCAATCGTCGGCAGCGTCAGATGTGTAT	CGTACCAA	TTGGTACG
Ad1.41	AATGATACGGCGACCACCGAGATCTACACCCAGTTTATCGTCGGCAGCGTCAGATGTGTAT	CCAGTTTA	TAAACTGG
Ad1.42	AATGATACGGCGACCACCGAGATCTACACACCGGCCCTCGTCGGCAGCGTCAGATGTGTAT	ACCGGCCC	GGGCCGGT
Ad1.43	AATGATACGGCGACCACCGAGATCTACACCTAGAAGTTCGTCGGCAGCGTCAGATGTGTAT	CTAGAAGT	ACTTCTAG
Ad1.44	AATGATACGGCGACCACCGAGATCTACACCGCCAGATTCGTCGGCAGCGTCAGATGTGTAT	CGCCAGAT	ATCTGGCG
Ad1.45	AATGATACGGCGACCACCGAGATCTACACTCACATGGTCGTCGGCAGCGTCAGATGTGTAT	TCACATGG	CCATGTGA
Ad1.46	AATGATACGGCGACCACCGAGATCTACACGAACTCGATCGTCGGCAGCGTCAGATGTGTAT	GAACTCGA	TCGAGTTC
Ad1.47	AATGATACGGCGACCACCGAGATCTACACCCACCGTTTCGTCGGCAGCGTCAGATGTGTAT	CCACCGTT	AACGGTGG
Ad1.48	AATGATACGGCGACCACCGAGATCTACACTAAGTTACTCGTCGGCAGCGTCAGATGTGTAT	TAAGTTAC	GTAACTTA
Ad1.49	AATGATACGGCGACCACCGAGATCTACACGAGACGTGTCGTCGGCAGCGTCAGATGTGTAT	GAGACGTG	CACGTCTC
Ad1.50	AATGATACGGCGACCACCGAGATCTACACTTGCCTAATCGTCGGCAGCGTCAGATGTGTAT	TTGCCTAA	TTAGGCAA
Ad1.51	AATGATACGGCGACCACCGAGATCTACACTTAACTTGTCGTCGGCAGCGTCAGATGTGTAT	TTAACTTG	CAAGTTAA
Ad1.52	AATGATACGGCGACCACCGAGATCTACACCTTTAACATCGTCGGCAGCGTCAGATGTGTAT	CTTTAACA	TGTTAAAG
Ad1.53	AATGATACGGCGACCACCGAGATCTACACCGTAGACCTCGTCGGCAGCGTCAGATGTGTAT	CGTAGACC	GGTCTACG
Ad1.54	AATGATACGGCGACCACCGAGATCTACACTATTTGCGTCGTCGGCAGCGTCAGATGTGTAT	TATTTGCG	CGCAAATA
Ad1.55	AATGATACGGCGACCACCGAGATCTACACATCCAGGATCGTCGGCAGCGTCAGATGTGTAT	ATCCAGGA	TCCTGGAT
Ad1.56	AATGATACGGCGACCACCGAGATCTACACTGTTCCTGTCGTCGGCAGCGTCAGATGTGTAT	TGTTCCTG	CAGGAACA
Ad1.57	AATGATACGGCGACCACCGAGATCTACACACGCGCAGTCGTCGGCAGCGTCAGATGTGTAT	ACGCGCAG	CTGCGCGT
Ad1.58	AATGATACGGCGACCACCGAGATCTACACTCTGGCGATCGTCGGCAGCGTCAGATGTGTAT	TCTGGCGA	TCGCCAGA
Ad1.59	AATGATACGGCGACCACCGAGATCTACACAATCTACATCGTCGGCAGCGTCAGATGTGTAT	AATCTACA	TGTAGATT
Ad1.60	AATGATACGGCGACCACCGAGATCTACACTACTGACCTCGTCGGCAGCGTCAGATGTGTAT	TACTGACC	GGTCAGTA
Ad1.61	AATGATACGGCGACCACCGAGATCTACACCGATAGGGTCGTCGGCAGCGTCAGATGTGTAT	CGATAGGG	CCCTATCG
Ad1.62	AATGATACGGCGACCACCGAGATCTACACACTTAGAATCGTCGGCAGCGTCAGATGTGTAT	ACTTAGAA	TTCTAAGT
Ad1.63	AATGATACGGCGACCACCGAGATCTACACAGAGATCTTCGTCGGCAGCGTCAGATGTGTAT	AGAGATCT	AGATCTCT
Ad1.64	AATGATACGGCGACCACCGAGATCTACACGGTGAAGGTCGTCGGCAGCGTCAGATGTGTAT	GGTGAAGG	CCTTCACC
Ad1.65	AATGATACGGCGACCACCGAGATCTACACATCGAATGTCGTCGGCAGCGTCAGATGTGTAT	ATCGAATG	CATTCGAT
Ad1.66	AATGATACGGCGACCACCGAGATCTACACTCAAGAGCTCGTCGGCAGCGTCAGATGTGTAT	TCAAGAGC	GCTCTTGA
Ad1.67	AATGATACGGCGACCACCGAGATCTACACGCCCACGTTCGTCGGCAGCGTCAGATGTGTAT	GCCCACGT	ACGTGGGC
Ad1.68	AATGATACGGCGACCACCGAGATCTACACTGGGCGGTTCGTCGGCAGCGTCAGATGTGTAT	TGGGCGGT	ACCGCCCA
Ad1.69	AATGATACGGCGACCACCGAGATCTACACCCCTTGGATCGTCGGCAGCGTCAGATGTGTAT	CCCTTGGA	TCCAAGGG
Ad1.70	AATGATACGGCGACCACCGAGATCTACACATTACCGTTCGTCGGCAGCGTCAGATGTGTAT	ATTACCGT	ACGGTAAT
Ad1.71	AATGATACGGCGACCACCGAGATCTACACAGTCCGAGTCGTCGGCAGCGTCAGATGTGTAT	AGTCCGAG	CTCGGACT
Ad1.72	AATGATACGGCGACCACCGAGATCTACACACTTGTTGTCGTCGGCAGCGTCAGATGTGTAT	ACTTGTTG	CAACAAGT
Ad1.73	AATGATACGGCGACCACCGAGATCTACACGTAATACATCGTCGGCAGCGTCAGATGTGTAT	GTAATACA	TGTATTAC
Ad1.74	AATGATACGGCGACCACCGAGATCTACACGGCGTCTATCGTCGGCAGCGTCAGATGTGTAT	GGCGTCTA	TAGACGCC
Ad1.75	AATGATACGGCGACCACCGAGATCTACACGCGCTGCTTCGTCGGCAGCGTCAGATGTGTAT	GCGCTGCT	AGCAGCGC
Ad1.76	AATGATACGGCGACCACCGAGATCTACACGTGCCATTTCGTCGGCAGCGTCAGATGTGTAT	GTGCCATT	AATGGCAC
Ad1.77	AATGATACGGCGACCACCGAGATCTACACTAGGTATGTCGTCGGCAGCGTCAGATGTGTAT	TAGGTATG	CATACCTA
Ad1.78	AATGATACGGCGACCACCGAGATCTACACAACACCTATCGTCGGCAGCGTCAGATGTGTAT	AACACCTA	TAGGTGTT
Ad1.79	AATGATACGGCGACCACCGAGATCTACACCTCCGAACTCGTCGGCAGCGTCAGATGTGTAT	CTCCGAAC	GTTCGGAG
Ad1.80	AATGATACGGCGACCACCGAGATCTACACCAACGGCATCGTCGGCAGCGTCAGATGTGTAT	CAACGGCA	TGCCGTTG
Ad1.81	AATGATACGGCGACCACCGAGATCTACACCAATGTAGTCGTCGGCAGCGTCAGATGTGTAT	CAATGTAG	CTACATTG
Ad1.82	AATGATACGGCGACCACCGAGATCTACACGGCTACCCTCGTCGGCAGCGTCAGATGTGTAT	GGCTACCC	GGGTAGCC
Ad1.83	AATGATACGGCGACCACCGAGATCTACACAAAGTCCGTCGTCGGCAGCGTCAGATGTGTAT	AAAGTCCG	CGGACTTT
Ad1.84	AATGATACGGCGACCACCGAGATCTACACTTCCGCGGTCGTCGGCAGCGTCAGATGTGTAT	TTCCGCGG	CCGCGGAA
Ad1.85	AATGATACGGCGACCACCGAGATCTACACAGGCACTTTCGTCGGCAGCGTCAGATGTGTAT	AGGCACTT	AAGTGCCT
Ad1.86	AATGATACGGCGACCACCGAGATCTACACCTTCAGTGTCGTCGGCAGCGTCAGATGTGTAT	CTTCAGTG	CACTGAAG
Ad1.87	AATGATACGGCGACCACCGAGATCTACACGCCGGTAGTCGTCGGCAGCGTCAGATGTGTAT	GCCGGTAG	CTACCGGC
Ad1.88	AATGATACGGCGACCACCGAGATCTACACTTCAATCCTCGTCGGCAGCGTCAGATGTGTAT	TTCAATCC	GGATTGAA
Ad1.89	AATGATACGGCGACCACCGAGATCTACACCCACACACTCGTCGGCAGCGTCAGATGTGTAT	CCACACAC	GTGTGTGG
Ad1.90	AATGATACGGCGACCACCGAGATCTACACATATTATCTCGTCGGCAGCGTCAGATGTGTAT	ATATTATC	GATAATAT
Ad1.91	AATGATACGGCGACCACCGAGATCTACACCCGAAGCATCGTCGGCAGCGTCAGATGTGTAT	CCGAAGCA	TGCTTCGG
Ad1.92	AATGATACGGCGACCACCGAGATCTACACGTATCGGTTCGTCGGCAGCGTCAGATGTGTAT	GTATCGGT	ACCGATAC
Custom Barcodes Adapter 2 (index i7):
Adapter Name	Adapter Sequence	SampleSheet Barcode - All Sequencers
Ad2.1	CAAGCAGAAGACGGCATACGAGATTCGCCTTAGTCTCGTGGGCTCGGAGATGTG	TAAGGCGA
Ad2.2	CAAGCAGAAGACGGCATACGAGATCTAGTACGGTCTCGTGGGCTCGGAGATGTG	CGTACTAG
Ad2.3	CAAGCAGAAGACGGCATACGAGATTTCTGCCTGTCTCGTGGGCTCGGAGATGTG	AGGCAGAA
Ad2.4	CAAGCAGAAGACGGCATACGAGATGCTCAGGAGTCTCGTGGGCTCGGAGATGTG	TCCTGAGC
Ad2.5	CAAGCAGAAGACGGCATACGAGATAGGAGTCCGTCTCGTGGGCTCGGAGATGTG	GGACTCCT
Ad2.6	CAAGCAGAAGACGGCATACGAGATCATGCCTAGTCTCGTGGGCTCGGAGATGTG	TAGGCATG
Ad2.7	CAAGCAGAAGACGGCATACGAGATGTAGAGAGGTCTCGTGGGCTCGGAGATGTG	CTCTCTAC
Ad2.8	CAAGCAGAAGACGGCATACGAGATCCTCTCTGGTCTCGTGGGCTCGGAGATGTG	CAGAGAGG
Ad2.9	CAAGCAGAAGACGGCATACGAGATAGCGTAGCGTCTCGTGGGCTCGGAGATGTG	GCTACGCT
Ad2.10	CAAGCAGAAGACGGCATACGAGATCAGCCTCGGTCTCGTGGGCTCGGAGATGTG	CGAGGCTG
Ad2.11	CAAGCAGAAGACGGCATACGAGATTGCCTCTTGTCTCGTGGGCTCGGAGATGTG	AAGAGGCA
Ad2.12	CAAGCAGAAGACGGCATACGAGATTCCTCTACGTCTCGTGGGCTCGGAGATGTG	GTAGAGGA
Ad2.13	CAAGCAGAAGACGGCATACGAGATCAGATCCAGTCTCGTGGGCTCGGAGATGTG	TGGATCTG
Ad2.14	CAAGCAGAAGACGGCATACGAGATACAAACGGGTCTCGTGGGCTCGGAGATGTG	CCGTTTGT
Ad2.15	CAAGCAGAAGACGGCATACGAGATACCCAGCAGTCTCGTGGGCTCGGAGATGTG	TGCTGGGT
Ad2.16	CAAGCAGAAGACGGCATACGAGATCCCAACCTGTCTCGTGGGCTCGGAGATGTG	AGGTTGGG
Ad2.17	CAAGCAGAAGACGGCATACGAGATCACCACACGTCTCGTGGGCTCGGAGATGTG	GTGTGGTG
Ad2.18	CAAGCAGAAGACGGCATACGAGATGAAACCCAGTCTCGTGGGCTCGGAGATGTG	TGGGTTTC
Ad2.19	CAAGCAGAAGACGGCATACGAGATTGTGACCAGTCTCGTGGGCTCGGAGATGTG	TGGTCACA
Ad2.20	CAAGCAGAAGACGGCATACGAGATAGGGTCAAGTCTCGTGGGCTCGGAGATGTG	TTGACCCT
Ad2.21	CAAGCAGAAGACGGCATACGAGATTGTCCGCGGTCTCGTGGGCTCGGAGATGTG	CGCGGACA
Ad2.22	CAAGCAGAAGACGGCATACGAGATATATGGAAGTCTCGTGGGCTCGGAGATGTG	TTCCATAT
Ad2.23	CAAGCAGAAGACGGCATACGAGATAACGAATTGTCTCGTGGGCTCGGAGATGTG	AATTCGTT
Ad2.24	CAAGCAGAAGACGGCATACGAGATTCGACGCCGTCTCGTGGGCTCGGAGATGTG	GGCGTCGA
Ad2.25	CAAGCAGAAGACGGCATACGAGATCACTTTGTGTCTCGTGGGCTCGGAGATGTG	ACAAAGTG
Ad2.26	CAAGCAGAAGACGGCATACGAGATTTCAAGTAGTCTCGTGGGCTCGGAGATGTG	TACTTGAA
Ad2.27	CAAGCAGAAGACGGCATACGAGATGCTATCACGTCTCGTGGGCTCGGAGATGTG	GTGATAGC
Ad2.28	CAAGCAGAAGACGGCATACGAGATAATCTACTGTCTCGTGGGCTCGGAGATGTG	AGTAGATT
Ad2.29	CAAGCAGAAGACGGCATACGAGATCCGGCAATGTCTCGTGGGCTCGGAGATGTG	ATTGCCGG
Ad2.30	CAAGCAGAAGACGGCATACGAGATCTTAGCAAGTCTCGTGGGCTCGGAGATGTG	TTGCTAAG
Ad2.31	CAAGCAGAAGACGGCATACGAGATTAACTTATGTCTCGTGGGCTCGGAGATGTG	ATAAGTTA
Ad2.32	CAAGCAGAAGACGGCATACGAGATCGAGTGATGTCTCGTGGGCTCGGAGATGTG	ATCACTCG
Ad2.33	CAAGCAGAAGACGGCATACGAGATCTGTTAACGTCTCGTGGGCTCGGAGATGTG	GTTAACAG
Ad2.34	CAAGCAGAAGACGGCATACGAGATCTACCATTGTCTCGTGGGCTCGGAGATGTG	AATGGTAG
Ad2.35	CAAGCAGAAGACGGCATACGAGATACGTGCTCGTCTCGTGGGCTCGGAGATGTG	GAGCACGT
Ad2.36	CAAGCAGAAGACGGCATACGAGATTGACGAAAGTCTCGTGGGCTCGGAGATGTG	TTTCGTCA
Ad2.37	CAAGCAGAAGACGGCATACGAGATAATTCTTGGTCTCGTGGGCTCGGAGATGTG	CAAGAATT
Ad2.38	CAAGCAGAAGACGGCATACGAGATGGCATTTCGTCTCGTGGGCTCGGAGATGTG	GAAATGCC
Ad2.39	CAAGCAGAAGACGGCATACGAGATATGGCGTTGTCTCGTGGGCTCGGAGATGTG	AACGCCAT
Ad2.40	CAAGCAGAAGACGGCATACGAGATCTGCGAGGGTCTCGTGGGCTCGGAGATGTG	CCTCGCAG
Ad2.41	CAAGCAGAAGACGGCATACGAGATGAGGTGTAGTCTCGTGGGCTCGGAGATGTG	TACACCTC
Ad2.42	CAAGCAGAAGACGGCATACGAGATAAATGACCGTCTCGTGGGCTCGGAGATGTG	GGTCATTT
Ad2.43	CAAGCAGAAGACGGCATACGAGATTAAGATTGGTCTCGTGGGCTCGGAGATGTG	CAATCTTA
Ad2.44	CAAGCAGAAGACGGCATACGAGATAAGGCACAGTCTCGTGGGCTCGGAGATGTG	TGTGCCTT
Ad2.45	CAAGCAGAAGACGGCATACGAGATTAATAAGAGTCTCGTGGGCTCGGAGATGTG	TCTTATTA
Ad2.46	CAAGCAGAAGACGGCATACGAGATACTAAGTCGTCTCGTGGGCTCGGAGATGTG	GACTTAGT
Ad2.47	CAAGCAGAAGACGGCATACGAGATGCTGGTCTGTCTCGTGGGCTCGGAGATGTG	AGACCAGC
Ad2.48	CAAGCAGAAGACGGCATACGAGATCTGTATTTGTCTCGTGGGCTCGGAGATGTG	AAATACAG
Ad2.49	CAAGCAGAAGACGGCATACGAGATTTTCATAAGTCTCGTGGGCTCGGAGATGTG	TTATGAAA
Ad2.50	CAAGCAGAAGACGGCATACGAGATGACCCAAGGTCTCGTGGGCTCGGAGATGTG	CTTGGGTC
Ad2.51	CAAGCAGAAGACGGCATACGAGATTTATTTGGGTCTCGTGGGCTCGGAGATGTG	CCAAATAA
Ad2.52	CAAGCAGAAGACGGCATACGAGATTTTAACGCGTCTCGTGGGCTCGGAGATGTG	GCGTTAAA
Ad2.53	CAAGCAGAAGACGGCATACGAGATACAGGATGGTCTCGTGGGCTCGGAGATGTG	CATCCTGT
Ad2.54	CAAGCAGAAGACGGCATACGAGATCTTACTCCGTCTCGTGGGCTCGGAGATGTG	GGAGTAAG
Ad2.55	CAAGCAGAAGACGGCATACGAGATGGAGCGTCGTCTCGTGGGCTCGGAGATGTG	GACGCTCC
Ad2.56	CAAGCAGAAGACGGCATACGAGATGCCGCGAAGTCTCGTGGGCTCGGAGATGTG	TTCGCGGC
Ad2.57	CAAGCAGAAGACGGCATACGAGATGGGAACCGGTCTCGTGGGCTCGGAGATGTG	CGGTTCCC
Ad2.58	CAAGCAGAAGACGGCATACGAGATTAGCCGGTGTCTCGTGGGCTCGGAGATGTG	ACCGGCTA
Ad2.59	CAAGCAGAAGACGGCATACGAGATCCCATGAGGTCTCGTGGGCTCGGAGATGTG	CTCATGGG
Ad2.60	CAAGCAGAAGACGGCATACGAGATGCATTAAAGTCTCGTGGGCTCGGAGATGTG	TTTAATGC
Ad2.61	CAAGCAGAAGACGGCATACGAGATGACCGTTTGTCTCGTGGGCTCGGAGATGTG	AAACGGTC
Ad2.62	CAAGCAGAAGACGGCATACGAGATTTTGGATCGTCTCGTGGGCTCGGAGATGTG	GATCCAAA
Ad2.63	CAAGCAGAAGACGGCATACGAGATATCATCATGTCTCGTGGGCTCGGAGATGTG	ATGATGAT
Ad2.64	CAAGCAGAAGACGGCATACGAGATCGTGTTGGGTCTCGTGGGCTCGGAGATGTG	CCAACACG
Ad2.65	CAAGCAGAAGACGGCATACGAGATTGTTGTTAGTCTCGTGGGCTCGGAGATGTG	TAACAACA
Ad2.66	CAAGCAGAAGACGGCATACGAGATGGTTTACCGTCTCGTGGGCTCGGAGATGTG	GGTAAACC
Ad2.67	CAAGCAGAAGACGGCATACGAGATGGTCGATGGTCTCGTGGGCTCGGAGATGTG	CATCGACC
Ad2.68	CAAGCAGAAGACGGCATACGAGATGTTCCCATGTCTCGTGGGCTCGGAGATGTG	ATGGGAAC
Ad2.69	CAAGCAGAAGACGGCATACGAGATATTGGCCGGTCTCGTGGGCTCGGAGATGTG	CGGCCAAT
Ad2.70	CAAGCAGAAGACGGCATACGAGATTCATTCCCGTCTCGTGGGCTCGGAGATGTG	GGGAATGA
Ad2.71	CAAGCAGAAGACGGCATACGAGATCCGAATACGTCTCGTGGGCTCGGAGATGTG	GTATTCGG
Ad2.72	CAAGCAGAAGACGGCATACGAGATATAGCTGAGTCTCGTGGGCTCGGAGATGTG	TCAGCTAT
Ad2.73	CAAGCAGAAGACGGCATACGAGATAGATAAATGTCTCGTGGGCTCGGAGATGTG	ATTTATCT
Ad2.74	CAAGCAGAAGACGGCATACGAGATGCAACTGTGTCTCGTGGGCTCGGAGATGTG	ACAGTTGC
Ad2.75	CAAGCAGAAGACGGCATACGAGATATCTCGGGGTCTCGTGGGCTCGGAGATGTG	CCCGAGAT
Ad2.76	CAAGCAGAAGACGGCATACGAGATAGACATTAGTCTCGTGGGCTCGGAGATGTG	TAATGTCT
Ad2.77	CAAGCAGAAGACGGCATACGAGATGAATTGGCGTCTCGTGGGCTCGGAGATGTG	GCCAATTC
Ad2.78	CAAGCAGAAGACGGCATACGAGATGCACGGCGGTCTCGTGGGCTCGGAGATGTG	CGCCGTGC
Ad2.79	CAAGCAGAAGACGGCATACGAGATTCGGTCAGGTCTCGTGGGCTCGGAGATGTG	CTGACCGA
Ad2.80	CAAGCAGAAGACGGCATACGAGATTCGAAATGGTCTCGTGGGCTCGGAGATGTG	CATTTCGA
Ad2.81	CAAGCAGAAGACGGCATACGAGATTGGCAAGCGTCTCGTGGGCTCGGAGATGTG	GCTTGCCA
Ad2.82	CAAGCAGAAGACGGCATACGAGATTGGTAGAAGTCTCGTGGGCTCGGAGATGTG	TTCTACCA
Ad2.83	CAAGCAGAAGACGGCATACGAGATCGTCACGTGTCTCGTGGGCTCGGAGATGTG	ACGTGACG
Ad2.84	CAAGCAGAAGACGGCATACGAGATCGCGGACAGTCTCGTGGGCTCGGAGATGTG	TGTCCGCG
Ad2.85	CAAGCAGAAGACGGCATACGAGATAAGTTTAAGTCTCGTGGGCTCGGAGATGTG	TTAAACTT
Ad2.86	CAAGCAGAAGACGGCATACGAGATGTTGTGGTGTCTCGTGGGCTCGGAGATGTG	ACCACAAC
Ad2.87	CAAGCAGAAGACGGCATACGAGATCCAGAGGCGTCTCGTGGGCTCGGAGATGTG	GCCTCTGG
Ad2.88	CAAGCAGAAGACGGCATACGAGATGTGGGCGAGTCTCGTGGGCTCGGAGATGTG	TCGCCCAC
Ad2.89	CAAGCAGAAGACGGCATACGAGATGCCTAGTGGTCTCGTGGGCTCGGAGATGTG	CACTAGGC
Ad2.90	CAAGCAGAAGACGGCATACGAGATGGCTTCGAGTCTCGTGGGCTCGGAGATGTG	TCGAAGCC
Ad2.91	CAAGCAGAAGACGGCATACGAGATGTACATGCGTCTCGTGGGCTCGGAGATGTG	GCATGTAC
Ad2.92	CAAGCAGAAGACGGCATACGAGATACTCGAACGTCTCGTGGGCTCGGAGATGTG	GTTCGAGT
Ad2.93	CAAGCAGAAGACGGCATACGAGATGCGCCCGGGTCTCGTGGGCTCGGAGATGTG	CCGGGCGC
Ad2.94	CAAGCAGAAGACGGCATACGAGATTTAAATCTGTCTCGTGGGCTCGGAGATGTG	AGATTTAA
Ad2.95	CAAGCAGAAGACGGCATACGAGATCAATGGTGGTCTCGTGGGCTCGGAGATGTG	CACCATTG
Ad2.96	CAAGCAGAAGACGGCATACGAGATGTCTTATTGTCTCGTGGGCTCGGAGATGTG	AATAAGAC
